# Supplementary material for: Angiopoietin-2 attenuates angiotensin II-induced aortic aneurysm and atherosclerosis in apolipoprotein E-deficient mice
Source: PubMed Central journal article supplement (PMC5073347; doi:10.1038/srep35190), 2016-10-21
Supplement: srep35190-s1.pdf [file srep35190-s1.pdf]

## SUPPLEMENTAL MATERIAL

### Angiotensin-2 attenuates angiotensin II-induced aortic aneurysm and atherosclerosis in apolipoprotein E-deficient mice.

Hongyou YU, Corey S. Moran, Alexandra F. Trollope, Lynn Woodward, Robert Kinobe, Catherine M. Rush, Jonathan Golledge.

#### Supplementary Figures

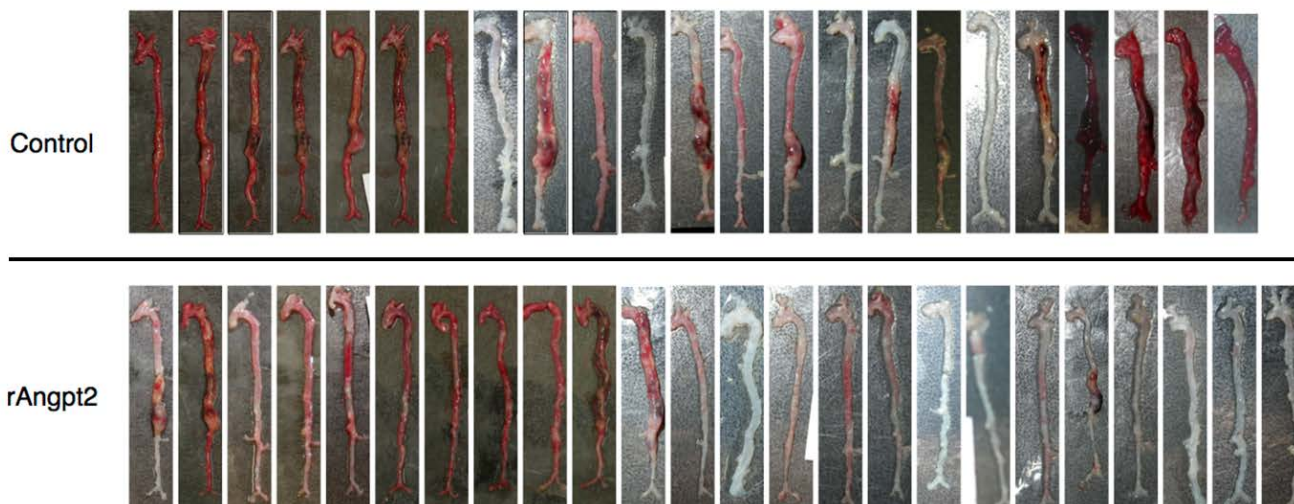

**Fig. S1:** Whole aortas harvested from AngII infused ApoE<sup>-/-</sup> mice that received control peptide (n=23) or rAngpt2 (n=24).

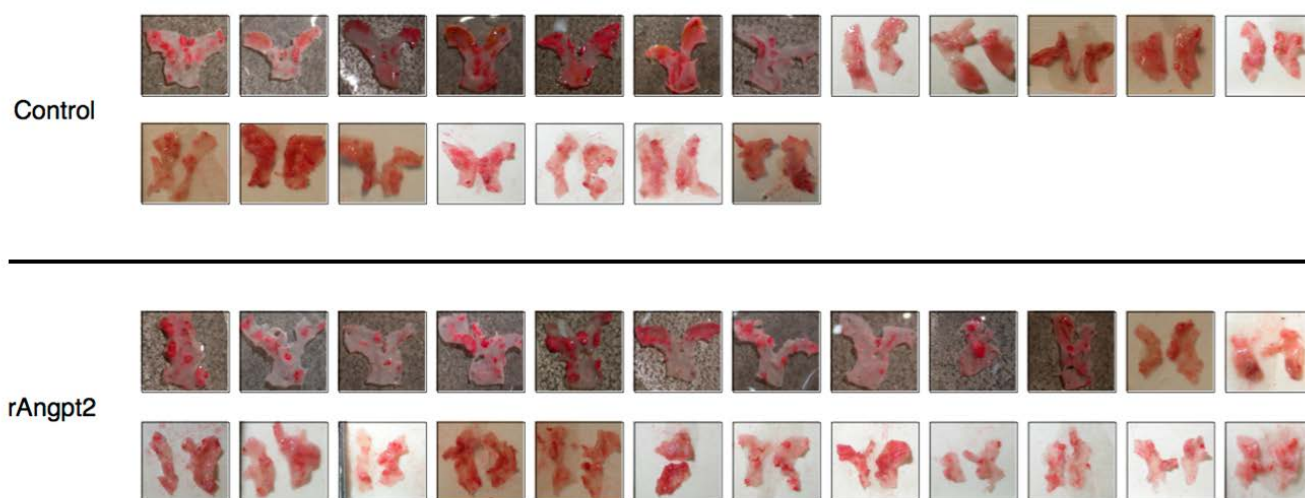

**Fig. S2:** Sudan IV staining of aortic arches from AngII infused ApoE<sup>-/-</sup> mice that received control peptide (n=19) or rAngpt2 (n=24).

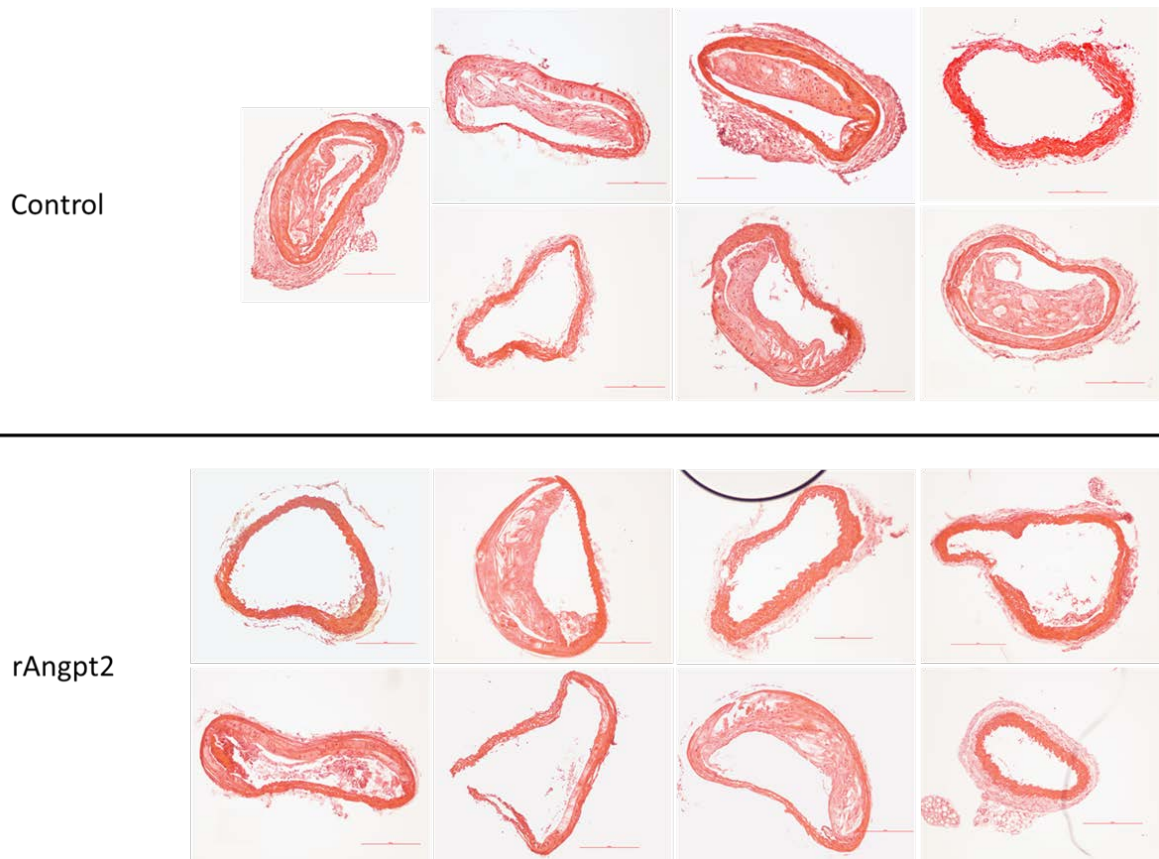

**Fig. S3:** Atherosclerotic plaque within the brachiocephalic artery from AngII infused ApoE<sup>-/-</sup> mice that received control peptide (n=7) or rAngpt2 (n=8). Scale bar, 500  $\mu$ m.

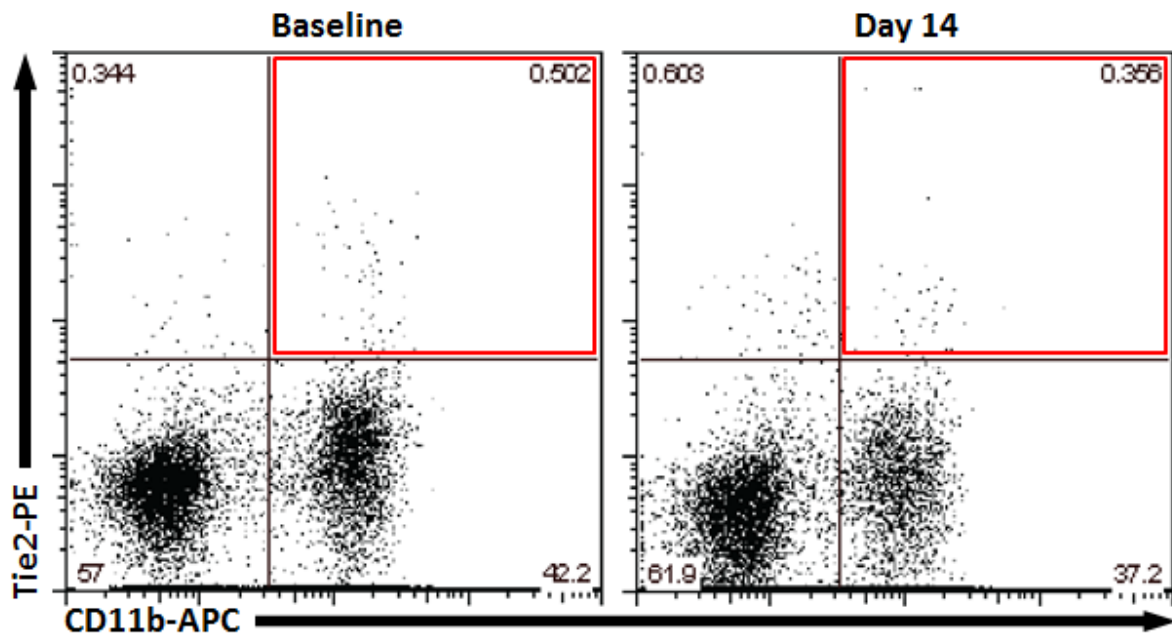

**Fig. S4:** Representative FACS plots for CD11b<sup>+</sup>Tie2<sup>+</sup> leukocytes as % total (CD11b<sup>+</sup>) population prior to (baseline) and in response to 14 days of AngII infusion.
